# Supplementary figures and images for: Differential repression of human and mouse TERT genes during cell differentiation
Source: PubMed Central journal article supplement — Nucleic Acids Res. 2009 Mar 6;37(8):2618–29. doi: 10.1093/nar/gkp125 (PMC2677880; doi:10.1093/nar/gkp125), 2009-03-06

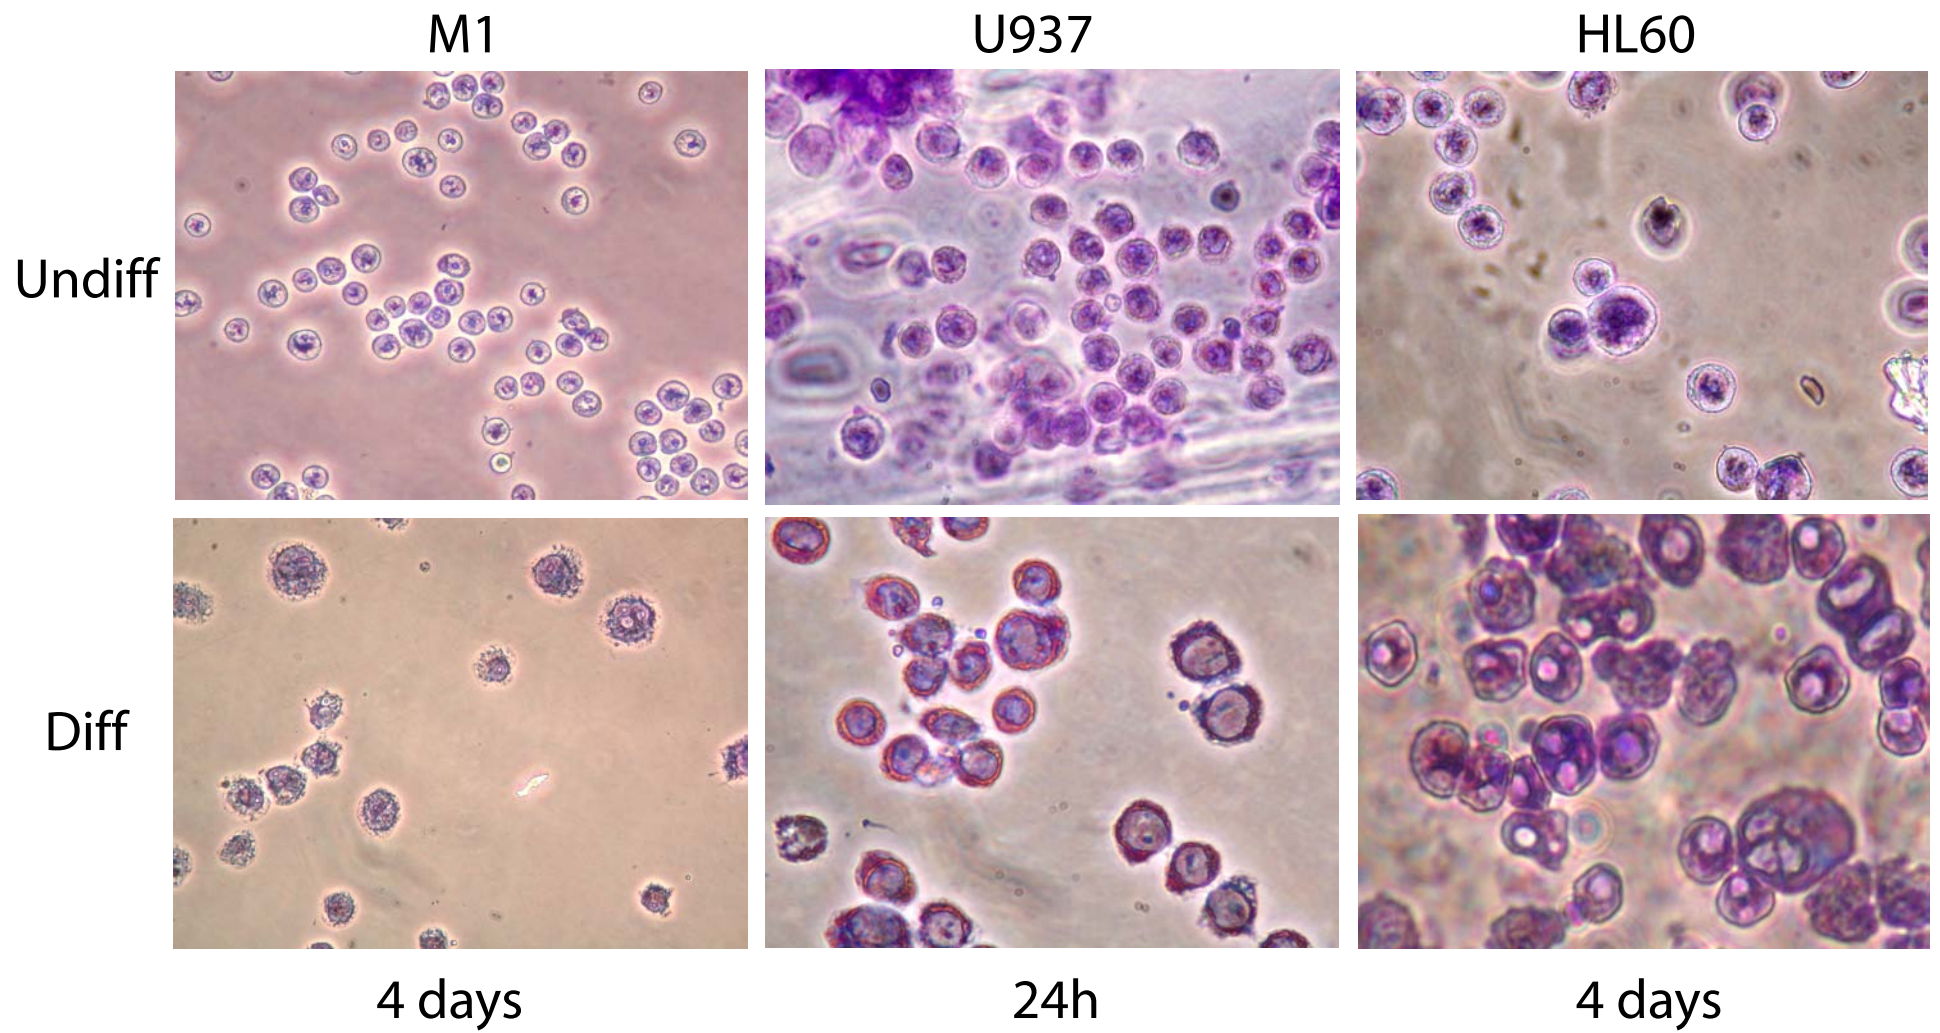

Supplement: gkp125_1.pdf [file gkp125_1.pdf]
